# Supplementary material
Source: Springer Nature journal article supplement (https://www.springermedizin.de/resource/supplementary/13075_2009_2802_MOESM1_ESM.pdf/9692916)

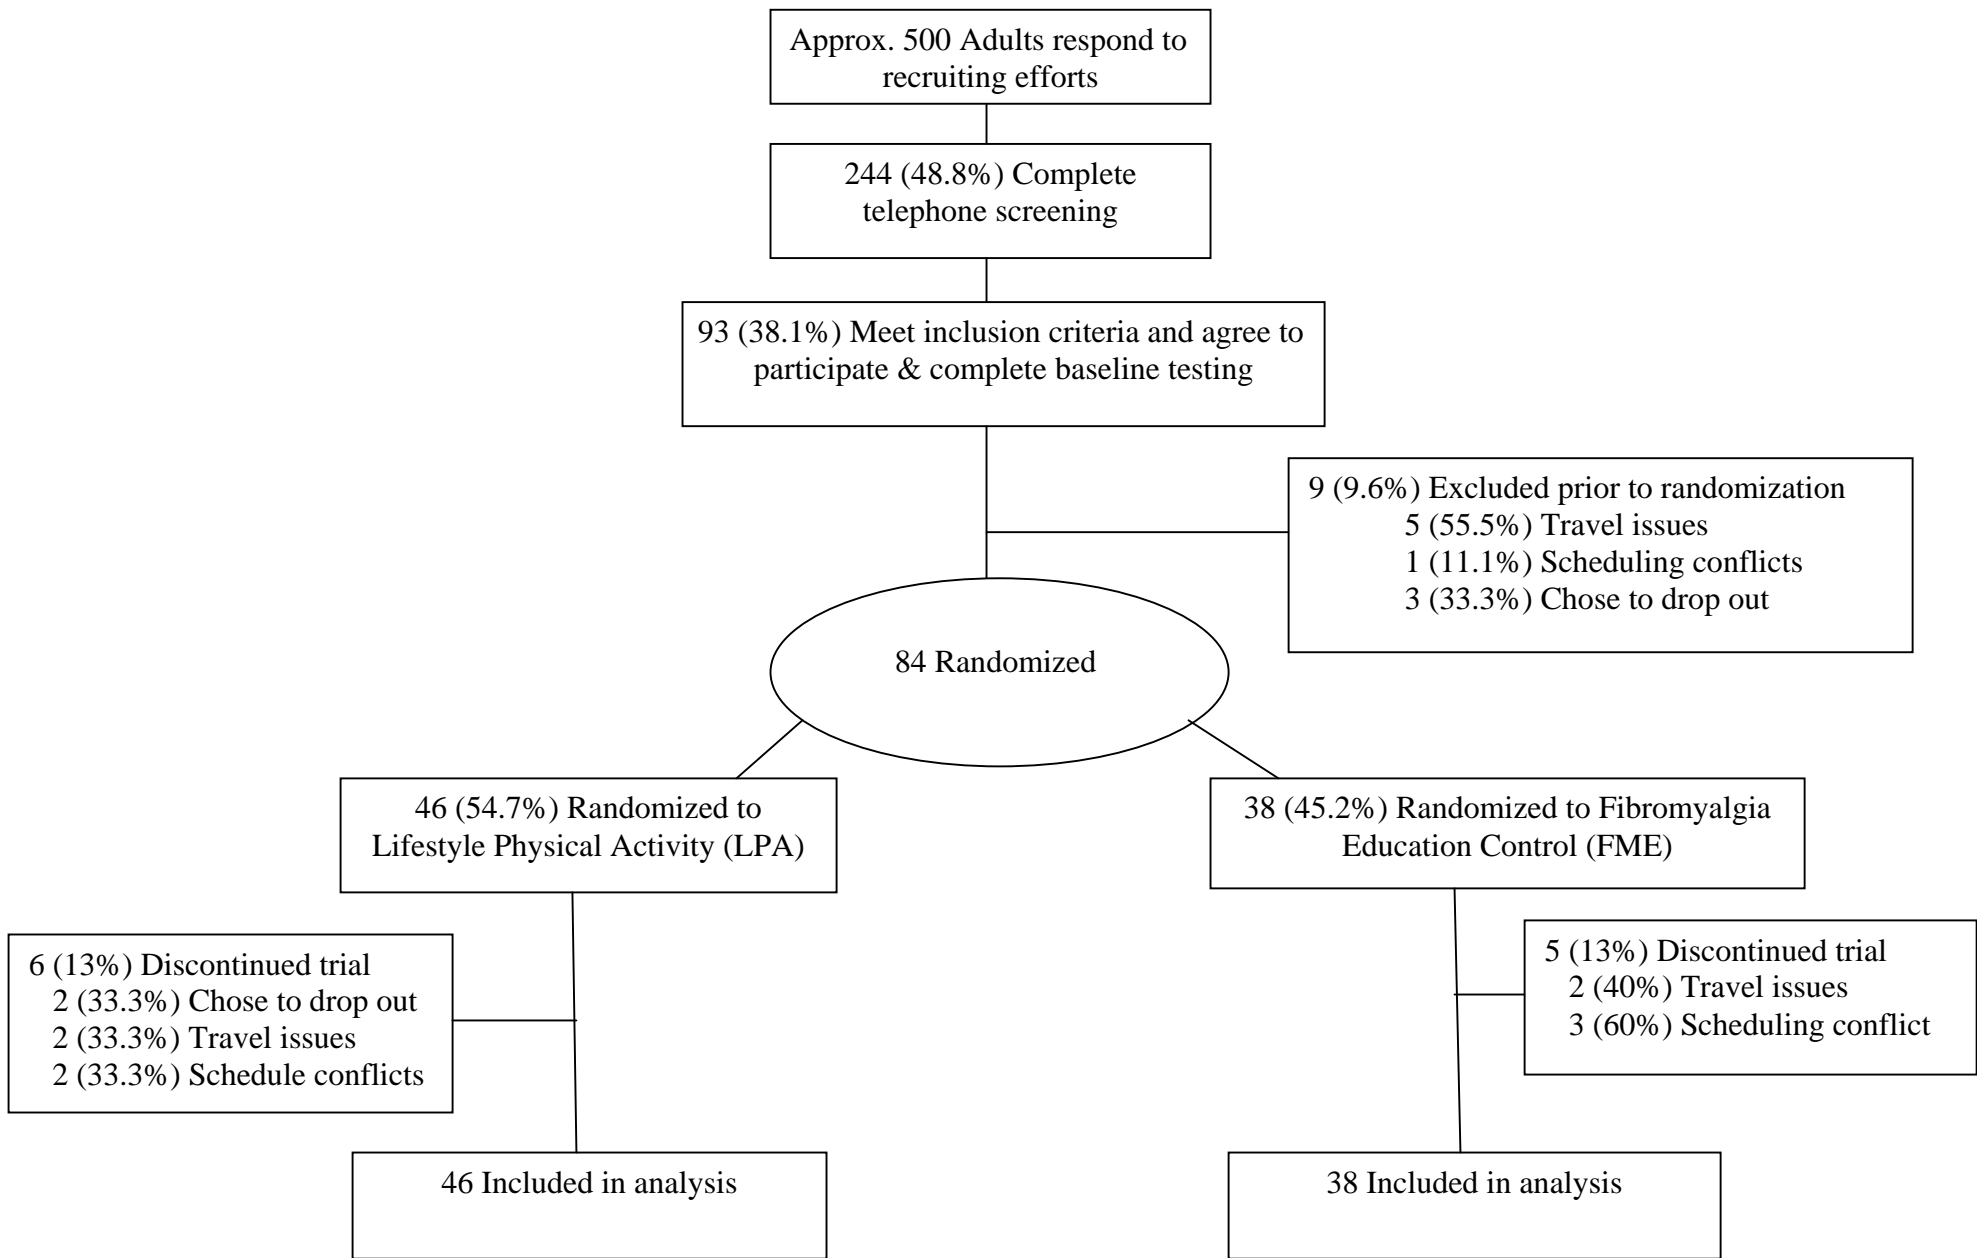

Supplement: MOESM1 [file 9692916]
